# Supplementary material for: Lithium migration pathways at the composite interface of LiBH4and two-dimensional MoS2enabling superior ionic conductivity at room temperature
Source: Royal Society of Chemistry journal article supplement (doi:10.1039/c9cp06090a), 2020-01-01
Supplement: c9cp06090a1.pdf [file c9cp06090a1.pdf]

Supporting information of Lithium migration pathways at composite  
interface of  $\text{LiBH}_4$  and two-dimensional  $\text{MoS}_2$  enabling superior ionic  
conductivity at room temperature

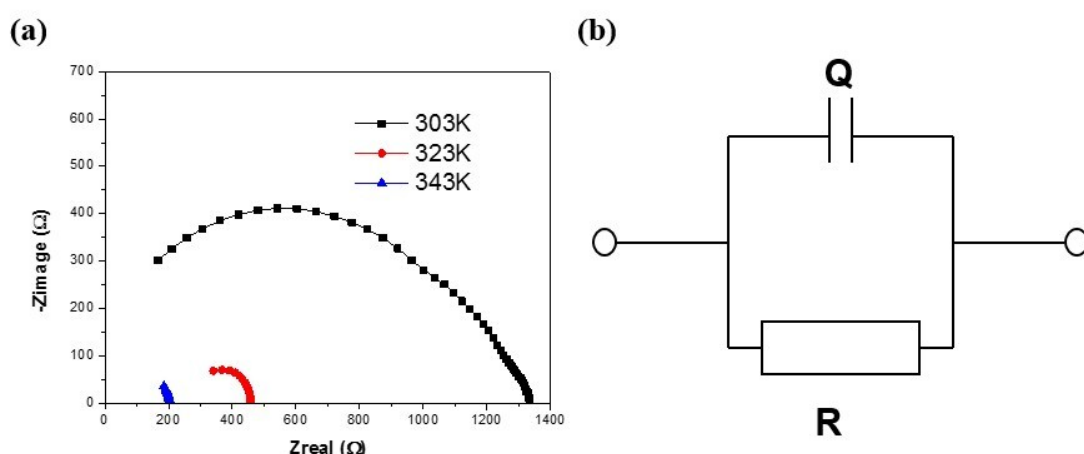

Supplementary Figure 1 (a) The Nyquist plots of the as-prepared  $\text{LiBH}_4$ -5 $\text{MoS}_2$  composite at different temperatures. Dots are experimental results, while lines are fitted results with (RQ) equivalent circuit; (b) The equivalent circuit for AC impedance spectra.

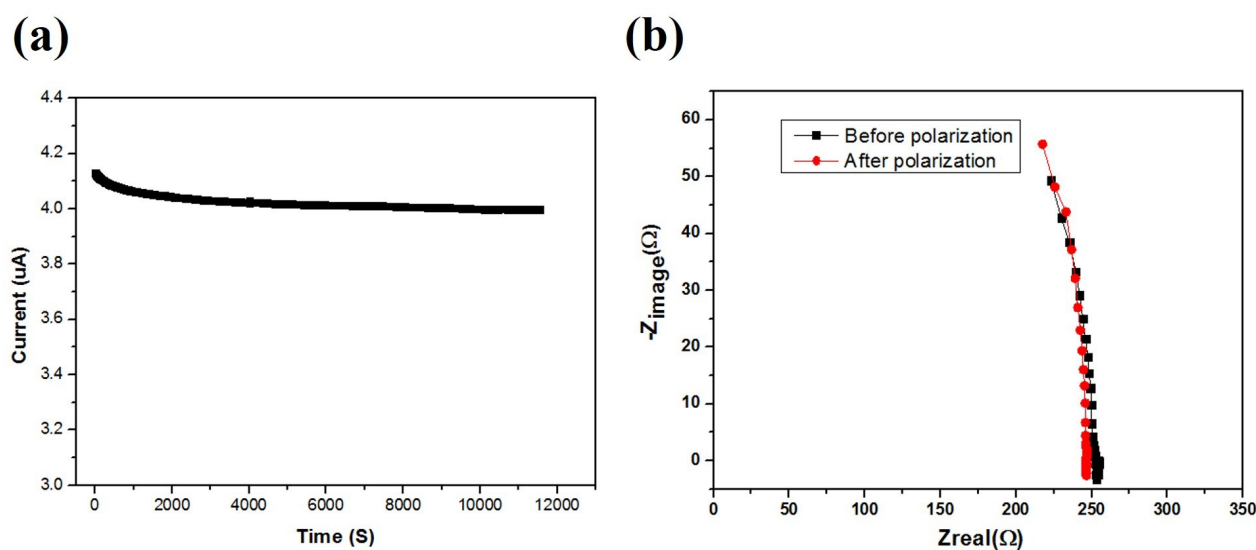

Supplementary Figure 2 Transference number of  $\text{LiBH}_4$ -5 $\text{MoS}_2$  measured by direct current polarization and EIS techniques

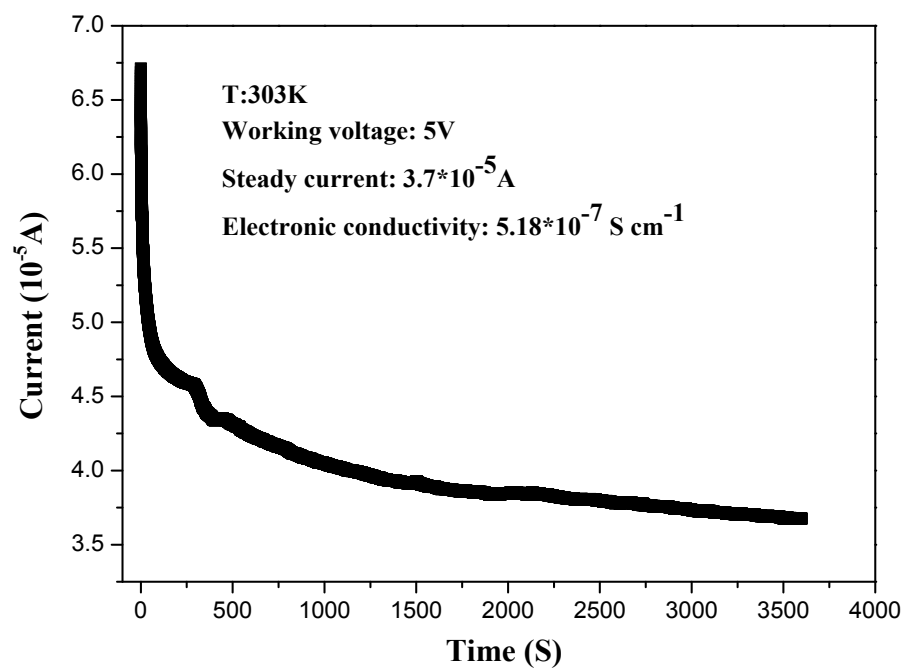

Supplementary Figure 3 DC polarization curve of the as-prepared LiBH<sub>4</sub>-5MoS<sub>2</sub> composite.

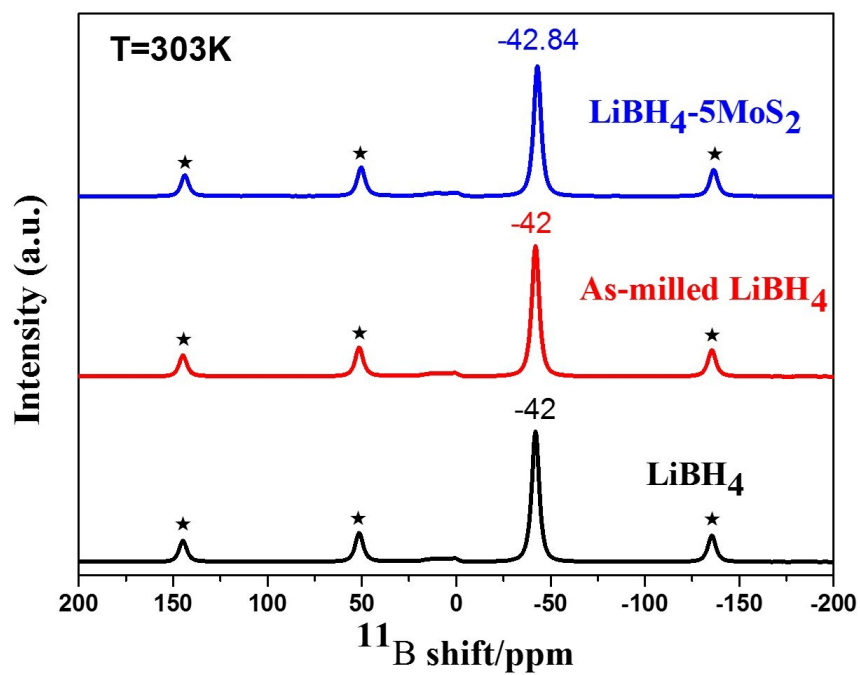

Supplementary Figure 4 MAS NMR spectra  $^{11}\text{B}$  in as-prepared  $\text{LiBH}_4\text{-MoS}_2$  composite, as-milled  $\text{LiBH}_4$  and bulk  $\text{LiBH}_4$ . All spectra are obtained at 303K. Spinning sidebands are marked by asterisks.
